# Supplementary material for: Analysis of the Correlation between Frontal Alpha Asymmetry of Electroencephalography and Short-Term Subjective Well-Being Changes
Source: MDPI journal article supplement (doi:10.3390/s23157006), 2023-08-07
Supplement: s1 [file s1]

## Supplementary Material

As mentioned in the main text, we used custom-made sensors developed by Peper et al. [27] for measuring temperature and humidity in Experiment 2. In Table S1 we give the mean values of the temperature and humidity of each session with the standard deviation, the maximum and minimum value recorded during each session.

**Table S1.** In the first column we give the Part-Temp-Hum-Trial variable, where Part stands for the participant number, Temp for the temperature (L = low, M = medium, H = high), Hum for the humidity (L = low, H = high) and Trial for the trial number (some trials had to be repeated). The numbers in the first columns of the first seven rows are the intended absolute values. From row 8 on we started using relative values. The temperature and humidity recordings for 28-M-L-1 were accidentally deleted. This is marked as ‘-’ in the table.  $T_{\text{mean}}$  stands for the mean temperature over the whole session and all used sensors.  $T_{\text{std}}$  gives the standard deviation and  $T_{\text{min}}$  and  $T_{\text{max}}$  the minimum and maximum value measured during the session.  $H_{\text{mean}}$  is analogously the mean humidity over the whole time of the session and all used sensors.  $H_{\text{std}}$  stands for the standard deviation and  $H_{\text{min}}$  and  $H_{\text{max}}$  represent the minimum and maximum humidity value measured during this one session.  $T_{\text{mean}}$ ,  $T_{\text{std}}$ ,  $T_{\text{min}}$ , and  $T_{\text{max}}$  are given in units of degree Celsius [°C] and  $H_{\text{mean}}$ ,  $H_{\text{std}}$ ,  $H_{\text{min}}$  and  $H_{\text{max}}$  in percent [%].

| Part-Temp-Hum-Trial | $T_{\text{mean}}$<br>[°C] | $T_{\text{std}}$<br>[°C] | $T_{\text{min}}$<br>[°C] | $T_{\text{max}}$<br>[°C] | $H_{\text{mean}}$<br>[%] | $H_{\text{std}}$<br>[%] | $H_{\text{min}}$<br>[%] | $H_{\text{max}}$<br>[%] |
|---------------------|---------------------------|--------------------------|--------------------------|--------------------------|--------------------------|-------------------------|-------------------------|-------------------------|
| 01-20-60-1          | 20.23                     | 0.96                     | 18.02                    | 22.35                    | 54.81                    | 3.56                    | 48.34                   | 67.11                   |
| 01-20-50-1          | 21.87                     | 0.93                     | 20.04                    | 23.39                    | 51.01                    | 3.34                    | 45.87                   | 61.10                   |
| 01-20-55-1          | 20.00                     | 0.89                     | 18.24                    | 22.28                    | 60.37                    | 3.89                    | 50.56                   | 72.59                   |
| 01-20-60-1          | 19.47                     | 0.87                     | 17.67                    | 21.10                    | 63.13                    | 3.34                    | 55.16                   | 70.65                   |
| 01-19-60-1          | 19.12                     | 0.93                     | 17.20                    | 21.04                    | 64.07                    | 3.77                    | 56.04                   | 71.00                   |
| 01-23-55-1          | 23.56                     | 1.11                     | 21.16                    | 25.28                    | 52.74                    | 3.97                    | 45.38                   | 63.93                   |
| 01-26-50-1          | 24.96                     | 1.25                     | 22.05                    | 27.27                    | 51.65                    | 4.18                    | 45.02                   | 64.63                   |
| 01-L-L-1            | 20.71                     | 0.51                     | 19.27                    | 21.88                    | 25.23                    | 0.93                    | 23.30                   | 27.67                   |
| 01-M-L-1            | 23.50                     | 0.56                     | 22.01                    | 24.33                    | 26.03                    | 1.01                    | 24.12                   | 28.38                   |
| 01-H-L-1            | 25.99                     | 0.97                     | 24.32                    | 28.34                    | 25.01                    | 1.11                    | 22.57                   | 26.79                   |
| 02-M-H-1            | 23.42                     | 0.69                     | 22.05                    | 24.99                    | 63.16                    | 8.44                    | 46.04                   | 75.90                   |
| 02-L-H-1            | 21.45                     | 0.50                     | 20.44                    | 22.45                    | 62.19                    | 4.06                    | 52.76                   | 72.89                   |
| 02-L-L-1            | 20.62                     | 0.45                     | 19.32                    | 21.33                    | 32.04                    | 1.50                    | 28.72                   | 35.99                   |
| 02-M-L-1            | 23.58                     | 0.62                     | 22.15                    | 24.59                    | 32.64                    | 1.13                    | 29.78                   | 35.10                   |
| 03-L-H-1            | 20.83                     | 0.64                     | 18.99                    | 21.90                    | 52.53                    | 5.11                    | 41.98                   | 67.06                   |
| 03-M-H-1            | 22.99                     | 0.71                     | 21.34                    | 24.82                    | 53.25                    | 5.96                    | 40.03                   | 83.69                   |
| 03-H-H-1            | 25.62                     | 0.75                     | 24.30                    | 27.46                    | 46.43                    | 3.51                    | 38.80                   | 55.09                   |
| 03-L-L-1            | 20.67                     | 0.60                     | 19.35                    | 21.96                    | 25.00                    | 0.93                    | 22.68                   | 27.15                   |
| 03-M-L-1            | 23.46                     | 0.71                     | 21.66                    | 24.37                    | 26.11                    | 1.15                    | 23.92                   | 28.91                   |
| 03-H-L-1            | 25.70                     | 0.78                     | 23.78                    | 26.87                    | 25.77                    | 0.85                    | 24.65                   | 27.75                   |
| 04-L-H-1            | 20.77                     | 0.45                     | 19.84                    | 21.55                    | 57.72                    | 3.29                    | 48.79                   | 65.33                   |
| 04-M-H-1            | 23.62                     | 1.01                     | 22.01                    | 25.14                    | 52.37                    | 6.07                    | 42.37                   | 63.61                   |
| 04-M-H-2            | 23.55                     | 1.13                     | 21.63                    | 25.51                    | 54.21                    | 7.35                    | 41.09                   | 68.82                   |
| 04-H-H-1            | 26.20                     | 1.33                     | 23.66                    | 28.72                    | 48.55                    | 7.08                    | 36.50                   | 65.95                   |

|          |       |      |       |       |       |      |       |       |
|----------|-------|------|-------|-------|-------|------|-------|-------|
| 04-M-L-1 | 22.58 | 0.43 | 21.54 | 23.62 | 21.85 | 0.98 | 18.81 | 23.91 |
| 04-H-L-1 | 26.38 | 0.95 | 24.79 | 29.10 | 23.19 | 1.00 | 20.80 | 25.59 |
| 05-L-H-1 | 19.50 | 0.50 | 18.18 | 20.30 | 55.96 | 3.91 | 48.17 | 67.41 |
| 05-M-H-1 | 23.30 | 0.89 | 21.85 | 24.80 | 51.23 | 5.46 | 38.26 | 67.72 |
| 05-H-H-1 | 25.96 | 0.86 | 24.09 | 27.51 | 46.64 | 3.81 | 40.74 | 54.68 |
| 05-L-L-1 | 21.09 | 0.46 | 19.72 | 21.79 | 27.66 | 0.78 | 26.04 | 30.05 |
| 05-M-L-1 | 23.53 | 0.83 | 21.75 | 25.18 | 27.42 | 1.32 | 24.34 | 30.40 |
| 05-H-L-1 | 25.97 | 0.66 | 24.72 | 27.11 | 26.89 | 0.80 | 25.40 | 28.63 |
| 06-L-H-1 | 19.42 | 0.49 | 18.19 | 20.30 | 58.45 | 2.91 | 52.41 | 67.94 |
| 06-M-H-1 | 23.43 | 0.92 | 21.89 | 25.23 | 56.04 | 3.81 | 46.44 | 63.19 |
| 06-H-H-1 | 26.17 | 0.90 | 24.30 | 27.93 | 51.90 | 3.13 | 44.85 | 60.25 |
| 06-L-L-1 | 20.61 | 0.54 | 19.65 | 21.73 | 38.80 | 1.10 | 35.77 | 40.89 |
| 06-L-L-2 | 20.50 | 0.51 | 19.35 | 21.56 | 38.70 | 1.12 | 36.12 | 41.42 |
| 06-H-L-1 | 26.11 | 0.85 | 24.16 | 28.03 | 34.71 | 1.34 | 32.08 | 38.00 |
| 06-M-L-1 | 22.42 | 0.55 | 20.81 | 23.76 | 34.31 | 0.93 | 32.35 | 37.65 |
| 07-L-H-1 | 21.09 | 0.47 | 20.11 | 21.90 | 72.10 | 3.09 | 63.29 | 79.43 |
| 07-M-H-1 | 23.64 | 0.82 | 22.24 | 25.06 | 67.79 | 5.72 | 56.48 | 80.27 |
| 07-H-H-1 | 25.71 | 1.14 | 23.27 | 27.59 | 63.69 | 7.69 | 51.21 | 79.26 |
| 07-L-L-1 | 20.74 | 0.41 | 19.60 | 21.45 | 38.64 | 0.71 | 37.54 | 40.74 |
| 07-M-L-1 | 22.90 | 0.53 | 21.72 | 23.86 | 39.66 | 1.10 | 36.71 | 41.64 |
| 07-M-L-2 | 23.54 | 0.61 | 22.20 | 24.95 | 38.49 | 1.48 | 34.91 | 40.76 |
| 07-H-L-1 | 26.15 | 0.67 | 24.95 | 27.25 | 37.62 | 1.19 | 35.26 | 40.27 |
| 08-L-H-1 | 20.67 | 0.59 | 19.27 | 21.56 | 68.55 | 3.60 | 57.81 | 77.44 |
| 08-M-H-1 | 23.04 | 0.95 | 21.49 | 24.95 | 64.40 | 6.65 | 49.97 | 75.72 |
| 08-H-H-1 | 26.00 | 1.34 | 23.77 | 28.63 | 59.67 | 8.03 | 43.25 | 74.97 |
| 08-L-L-1 | 20.99 | 0.45 | 20.00 | 21.76 | 31.49 | 0.68 | 30.29 | 33.05 |
| 08-M-L-1 | 23.57 | 0.74 | 22.01 | 25.04 | 32.35 | 1.52 | 28.89 | 34.65 |
| 08-H-L-1 | 25.94 | 1.04 | 24.20 | 27.97 | 30.47 | 1.90 | 26.59 | 34.26 |
| 09-L-H-1 | 19.52 | 0.54 | 18.57 | 20.48 | 62.72 | 6.64 | 53.12 | 75.64 |
| 09-M-H-1 | 22.68 | 1.10 | 21.07 | 24.77 | 60.78 | 7.82 | 46.61 | 75.67 |
| 09-H-H-1 | 25.48 | 1.26 | 23.21 | 27.98 | 56.63 | 8.85 | 42.19 | 71.39 |
| 09-L-L-1 | 21.43 | 0.56 | 20.07 | 22.31 | 28.70 | 1.00 | 26.75 | 30.51 |
| 09-M-L-1 | 23.53 | 0.51 | 22.15 | 24.35 | 29.68 | 0.75 | 27.66 | 31.38 |
| 09-H-L-1 | 26.15 | 0.65 | 25.05 | 27.45 | 28.13 | 1.09 | 25.71 | 30.37 |
| 10-L-H-1 | 21.07 | 0.48 | 19.64 | 21.90 | 63.07 | 4.30 | 47.73 | 73.07 |
| 10-M-H-1 | 22.83 | 0.71 | 21.61 | 24.24 | 59.49 | 7.11 | 45.02 | 72.84 |
| 10-M-H-2 | 22.87 | 0.71 | 21.78 | 24.11 | 57.51 | 6.68 | 43.39 | 72.14 |
| 10-H-H-1 | 25.31 | 1.18 | 23.16 | 27.54 | 55.19 | 8.95 | 41.80 | 71.08 |
| 10-L-L-1 | 20.98 | 0.44 | 19.74 | 21.89 | 23.81 | 0.79 | 22.00 | 25.55 |
| 10-M-L-1 | 23.35 | 0.58 | 21.89 | 24.48 | 25.90 | 0.82 | 23.98 | 27.75 |
| 10-H-L-1 | 26.11 | 1.01 | 23.64 | 28.34 | 25.16 | 1.50 | 22.04 | 28.42 |
| 11-L-H-1 | 19.44 | 0.61 | 18.13 | 20.63 | 56.61 | 4.43 | 44.63 | 66.35 |
| 11-L-H-2 | 19.44 | 0.49 | 18.28 | 20.25 | 56.40 | 3.91 | 46.75 | 63.70 |
| 11-M-H-1 | 22.78 | 1.19 | 20.57 | 25.61 | 55.30 | 9.21 | 39.15 | 71.21 |
| 11-H-H-1 | 25.26 | 1.40 | 22.50 | 28.86 | 50.71 | 9.80 | 33.14 | 67.85 |

|          |       |      |       |       |       |      |       |       |
|----------|-------|------|-------|-------|-------|------|-------|-------|
| 11-L-L-1 | 20.25 | 0.86 | 17.98 | 21.83 | 26.43 | 1.06 | 24.75 | 29.16 |
| 11-M-L-1 | 23.44 | 0.68 | 22.08 | 24.85 | 27.38 | 1.36 | 24.34 | 29.52 |
| 11-H-L-1 | 26.24 | 0.79 | 24.91 | 28.01 | 25.65 | 1.48 | 22.39 | 28.60 |
| 12-L-H-1 | 19.91 | 1.59 | 14.32 | 22.04 | 55.79 | 6.00 | 40.74 | 71.70 |
| 12-M-H-1 | 22.96 | 0.94 | 21.34 | 24.85 | 52.85 | 8.17 | 39.72 | 66.97 |
| 12-H-H-1 | 25.38 | 0.99 | 23.57 | 27.92 | 47.49 | 7.23 | 35.12 | 60.43 |
| 12-L-L-1 | 20.85 | 0.58 | 19.27 | 22.35 | 24.86 | 0.84 | 23.21 | 26.79 |
| 12-M-L-1 | 23.46 | 0.55 | 21.96 | 24.81 | 26.26 | 1.05 | 23.80 | 28.56 |
| 12-H-L-1 | 25.79 | 0.79 | 24.29 | 27.54 | 25.20 | 1.42 | 22.39 | 28.42 |
| 13-L-H-1 | 18.79 | 0.39 | 17.95 | 19.54 | 50.81 | 3.34 | 44.28 | 59.50 |
| 13-M-H-1 | 23.01 | 0.89 | 21.61 | 24.92 | 51.00 | 6.51 | 37.03 | 63.09 |
| 13-H-H-1 | 25.47 | 0.96 | 23.73 | 27.63 | 48.81 | 6.34 | 35.97 | 61.49 |
| 13-L-L-1 | 20.58 | 0.48 | 19.32 | 21.93 | 26.31 | 0.89 | 23.92 | 28.56 |
| 13-M-L-1 | 23.52 | 0.79 | 22.05 | 25.18 | 27.76 | 1.40 | 24.69 | 30.91 |
| 13-H-L-1 | 26.18 | 0.71 | 24.96 | 27.60 | 26.67 | 1.39 | 23.41 | 28.96 |
| 14-L-H-1 | 20.72 | 0.49 | 19.51 | 21.47 | 55.51 | 3.90 | 47.28 | 64.36 |
| 14-M-H-1 | 23.19 | 0.77 | 21.91 | 25.04 | 52.69 | 4.38 | 41.98 | 60.44 |
| 14-H-H-1 | 25.89 | 1.08 | 24.15 | 28.34 | 49.12 | 6.30 | 37.20 | 60.43 |
| 14-L-L-1 | 21.52 | 0.43 | 20.31 | 22.50 | 24.17 | 0.75 | 22.53 | 26.08 |
| 14-M-L-1 | 23.90 | 0.64 | 22.34 | 25.37 | 26.36 | 1.03 | 23.80 | 28.86 |
| 14-H-L-1 | 26.02 | 0.76 | 24.84 | 27.59 | 25.77 | 1.27 | 22.92 | 28.25 |
| 15-L-H-1 | 19.80 | 0.45 | 18.94 | 20.58 | 48.74 | 3.75 | 40.03 | 57.78 |
| 15-M-H-1 | 23.07 | 0.92 | 21.59 | 25.33 | 47.02 | 6.01 | 35.97 | 59.37 |
| 15-H-H-1 | 25.01 | 0.85 | 23.08 | 27.02 | 45.43 | 6.40 | 33.67 | 57.78 |
| 15-L-L-1 | 20.80 | 0.45 | 19.51 | 21.70 | 25.80 | 0.71 | 24.45 | 27.32 |
| 15-M-L-1 | 23.89 | 0.80 | 22.69 | 26.03 | 25.95 | 1.37 | 22.74 | 28.33 |
| 15-H-L-1 | 25.83 | 0.76 | 24.59 | 27.97 | 24.67 | 1.21 | 21.86 | 27.54 |
| 15-H-L-2 | 24.93 | 0.52 | 23.84 | 26.13 | 24.68 | 0.72 | 23.06 | 26.13 |
| 16-L-H-1 | 21.54 | 0.49 | 20.64 | 22.37 | 56.12 | 4.91 | 41.72 | 64.36 |
| 16-H-M-1 | 24.01 | 0.87 | 22.53 | 25.56 | 51.66 | 7.02 | 39.01 | 63.43 |
| 16-H-H-1 | 25.81 | 0.98 | 23.73 | 27.65 | 49.22 | 8.09 | 35.44 | 63.08 |
| 16-L-L-1 | 20.39 | 0.90 | 17.50 | 21.92 | 28.86 | 1.34 | 26.22 | 33.16 |
| 16-M-L-1 | 23.51 | 0.56 | 21.68 | 24.43 | 27.04 | 0.85 | 25.18 | 29.62 |
| 16-H-L-1 | 26.02 | 0.57 | 24.84 | 26.88 | 25.71 | 0.92 | 23.63 | 27.89 |
| 17-L-H-1 | 22.17 | 0.72 | 21.07 | 23.60 | 50.61 | 5.16 | 40.74 | 60.39 |
| 17-M-H-1 | 24.85 | 0.92 | 23.16 | 27.37 | 53.33 | 6.96 | 37.91 | 67.15 |
| 17-H-H-1 | 27.24 | 1.00 | 25.38 | 29.68 | 50.33 | 7.14 | 35.26 | 62.90 |
| 17-L-L-1 | 22.32 | 0.49 | 20.69 | 23.20 | 26.34 | 0.82 | 25.00 | 28.56 |
| 17-M-L-1 | 25.35 | 0.67 | 23.85 | 26.69 | 27.28 | 1.21 | 24.69 | 29.44 |
| 17-H-L-1 | 27.90 | 0.74 | 26.34 | 29.43 | 25.74 | 1.27 | 23.06 | 28.42 |
| 18-L-H-1 | 22.74 | 0.49 | 21.68 | 23.45 | 50.36 | 3.24 | 42.42 | 58.79 |
| 18-M-H-1 | 25.33 | 1.08 | 23.66 | 27.87 | 48.36 | 6.61 | 35.97 | 60.16 |
| 18-H-H-1 | 27.25 | 0.99 | 25.36 | 29.10 | 47.07 | 6.67 | 35.08 | 57.51 |
| 18-L-L-1 | 21.54 | 0.87 | 18.55 | 23.35 | 27.95 | 1.21 | 25.59 | 32.35 |
| 18-M-L-1 | 25.50 | 0.61 | 23.99 | 26.71 | 25.88 | 1.07 | 23.59 | 28.03 |

|          |       |      |       |       |       |      |       |       |
|----------|-------|------|-------|-------|-------|------|-------|-------|
| 18-H-L-1 | 27.89 | 0.67 | 26.59 | 29.10 | 24.51 | 1.16 | 22.04 | 26.83 |
| 19-L-H-1 | 20.88 | 0.46 | 19.65 | 21.62 | 52.83 | 3.40 | 44.63 | 62.68 |
| 19-M-H-1 | 24.20 | 0.84 | 22.93 | 25.89 | 52.39 | 5.37 | 40.43 | 60.07 |
| 19-M-H-2 | 24.00 | 0.79 | 22.59 | 25.47 | 53.45 | 7.14 | 40.21 | 66.44 |
| 19-H-H-1 | 26.50 | 0.67 | 25.33 | 28.06 | 48.84 | 6.62 | 35.79 | 62.46 |
| 19-L-L-1 | 20.72 | 0.98 | 17.28 | 22.78 | 30.93 | 1.65 | 27.81 | 37.38 |
| 19-M-L-1 | 24.71 | 0.65 | 23.19 | 26.65 | 29.02 | 1.25 | 25.75 | 31.21 |
| 19-H-L-1 | 26.81 | 0.75 | 25.42 | 29.43 | 27.88 | 1.44 | 24.16 | 31.08 |
| 20-L-H-1 | 22.09 | 0.48 | 20.88 | 22.79 | 60.22 | 3.50 | 51.53 | 68.78 |
| 20-M-H-1 | 24.50 | 0.79 | 23.00 | 26.36 | 56.17 | 5.95 | 41.62 | 66.62 |
| 20-H-H-1 | 26.84 | 0.92 | 25.05 | 28.91 | 54.00 | 6.74 | 39.54 | 66.35 |
| 20-L-L-1 | 22.20 | 0.58 | 20.88 | 23.15 | 29.81 | 1.08 | 27.99 | 31.38 |
| 20-M-L-1 | 25.04 | 0.74 | 23.47 | 27.12 | 29.22 | 1.43 | 25.71 | 31.38 |
| 20-H-L-1 | 26.92 | 1.02 | 25.64 | 29.71 | 28.41 | 1.70 | 23.98 | 30.90 |
| 20-H-L-2 | 26.78 | 0.81 | 25.55 | 28.72 | 27.92 | 1.45 | 24.83 | 30.55 |
| 20-H-L-3 | 26.26 | 0.49 | 25.40 | 27.40 | 27.79 | 0.97 | 25.53 | 29.84 |
| 20-H-L-4 | 27.14 | 0.57 | 26.06 | 28.58 | 27.71 | 1.20 | 24.83 | 30.02 |
| 21-L-L-1 | 22.74 | 0.46 | 21.82 | 23.31 | 46.36 | 0.87 | 45.01 | 48.27 |
| 21-M-L-1 | 24.41 | 0.76 | 23.00 | 26.08 | 45.07 | 1.89 | 40.07 | 49.15 |
| 21-H-L-1 | 26.84 | 1.06 | 24.93 | 29.24 | 42.08 | 2.36 | 36.18 | 47.34 |
| 21-L-H-1 | 22.72 | 0.52 | 21.35 | 23.63 | 65.26 | 3.31 | 53.47 | 74.48 |
| 21-M-H-1 | 24.29 | 0.62 | 22.76 | 25.48 | 63.53 | 5.20 | 52.41 | 75.01 |
| 21-H-H-1 | 26.97 | 0.95 | 25.47 | 29.02 | 60.22 | 5.49 | 47.28 | 71.74 |
| 21-H-H-2 | 26.95 | 0.73 | 25.73 | 28.69 | 60.94 | 5.41 | 48.17 | 70.86 |
| 21-H-H-3 | 26.88 | 0.58 | 25.50 | 27.89 | 62.22 | 4.86 | 50.82 | 71.83 |
| 22-L-H-1 | 22.69 | 0.49 | 21.58 | 23.63 | 71.74 | 2.77 | 65.87 | 79.21 |
| 22-M-H-1 | 24.56 | 0.83 | 23.04 | 26.22 | 68.60 | 5.22 | 54.53 | 78.86 |
| 22-H-H-1 | 26.93 | 1.13 | 25.12 | 29.71 | 66.65 | 7.28 | 48.97 | 79.96 |
| 22-L-L-1 | 20.85 | 1.19 | 17.22 | 22.92 | 48.25 | 2.40 | 43.72 | 57.28 |
| 22-M-L-1 | 24.91 | 0.69 | 23.37 | 26.41 | 44.34 | 1.70 | 39.72 | 46.77 |
| 22-H-L-1 | 27.30 | 0.87 | 25.88 | 29.05 | 42.23 | 2.19 | 37.24 | 46.11 |
| 23-L-H-1 | 22.73 | 0.53 | 21.25 | 23.53 | 74.04 | 2.66 | 66.47 | 81.51 |
| 23-M-H-1 | 24.59 | 0.65 | 22.95 | 25.56 | 69.33 | 4.29 | 59.31 | 79.92 |
| 23-H-H-1 | 26.89 | 0.76 | 25.59 | 28.20 | 67.52 | 5.10 | 56.16 | 77.76 |
| 23-L-L-1 | 21.73 | 1.31 | 16.99 | 23.77 | 49.84 | 3.56 | 44.25 | 65.49 |
| 23-M-L-1 | 25.26 | 0.53 | 23.56 | 26.08 | 45.52 | 1.37 | 42.19 | 48.97 |
| 23-H-L-1 | 27.12 | 0.59 | 25.73 | 28.48 | 44.23 | 1.62 | 39.54 | 47.34 |
| 24-L-H-1 | 22.64 | 0.48 | 21.68 | 23.44 | 72.75 | 2.98 | 65.34 | 78.55 |
| 24-M-H-1 | 24.70 | 0.76 | 23.19 | 25.94 | 71.52 | 5.40 | 57.18 | 82.09 |
| 24-H-H-1 | 26.88 | 1.02 | 25.17 | 28.77 | 69.15 | 6.66 | 54.53 | 80.94 |
| 24-L-L-1 | 22.47 | 0.63 | 20.81 | 23.86 | 42.85 | 1.17 | 40.49 | 45.78 |
| 24-M-L-1 | 25.14 | 0.57 | 23.47 | 26.41 | 41.23 | 1.32 | 37.60 | 43.59 |
| 24-H-L-1 | 27.26 | 0.81 | 25.99 | 28.96 | 39.43 | 1.74 | 34.94 | 42.92 |
| 24-H-L-2 | 27.45 | 0.73 | 26.08 | 29.24 | 38.47 | 1.76 | 34.24 | 42.39 |
| 25-L-L-1 | 22.39 | 0.45 | 21.53 | 23.08 | 34.38 | 0.66 | 33.47 | 36.64 |

|          |       |      |       |       |       |      |       |       |
|----------|-------|------|-------|-------|-------|------|-------|-------|
| 25-M-L-1 | 24.40 | 0.73 | 23.09 | 25.56 | 33.83 | 1.35 | 30.70 | 36.64 |
| 25-H-L-1 | 26.94 | 0.95 | 25.19 | 28.58 | 31.76 | 1.72 | 28.40 | 35.67 |
| 25-L-H-1 | 21.32 | 0.61 | 19.84 | 22.49 | 60.46 | 5.12 | 46.07 | 72.46 |
| 25-M-H-1 | 24.43 | 0.69 | 23.00 | 25.80 | 56.30 | 6.54 | 41.66 | 68.92 |
| 25-H-H-1 | 26.77 | 1.04 | 25.02 | 29.43 | 55.26 | 6.93 | 38.09 | 68.25 |
| 26-L-L-1 | 21.84 | 0.60 | 20.42 | 23.01 | 39.81 | 1.22 | 37.36 | 42.83 |
| 26-M-L-1 | 24.60 | 0.83 | 22.95 | 26.50 | 37.13 | 1.75 | 32.96 | 40.71 |
| 26-H-L-1 | 27.15 | 1.21 | 25.45 | 29.80 | 34.81 | 2.28 | 29.78 | 38.59 |
| 26-L-H-1 | 21.91 | 0.43 | 20.77 | 22.87 | 58.43 | 3.75 | 45.89 | 70.62 |
| 26-M-H-1 | 23.31 | 0.71 | 21.86 | 24.76 | 65.60 | 4.32 | 55.46 | 76.25 |
| 26-H-H-1 | 26.79 | 0.90 | 24.64 | 28.81 | 62.08 | 5.77 | 45.38 | 74.84 |
| 27-L-L-1 | 22.94 | 0.43 | 22.02 | 23.50 | 33.87 | 0.64 | 32.88 | 35.41 |
| 27-M-L-1 | 24.77 | 0.62 | 23.37 | 25.84 | 33.34 | 1.05 | 30.52 | 35.89 |
| 27-H-L-1 | 27.25 | 0.85 | 25.69 | 29.14 | 31.64 | 1.40 | 28.05 | 34.44 |
| 27-L-H-1 | 21.16 | 0.42 | 20.21 | 22.06 | 58.37 | 4.25 | 44.12 | 73.81 |
| 27-L-H-2 | 21.72 | 0.50 | 20.44 | 22.72 | 61.46 | 4.12 | 50.20 | 75.37 |
| 27-M-H-1 | 24.49 | 0.74 | 23.37 | 25.94 | 58.82 | 5.75 | 43.08 | 69.53 |
| 27-H-H-1 | 26.71 | 0.97 | 24.73 | 28.72 | 56.47 | 6.22 | 41.49 | 69.53 |
| 28-L-L-1 | 22.15 | 0.50 | 20.92 | 22.87 | 29.98 | 0.67 | 28.89 | 31.92 |
| 28-M-L-1 | -     | -    | -     | -     | -     | -    | -     | -     |
| 28-H-L-1 | 27.28 | 1.44 | 25.41 | 30.84 | 29.39 | 2.17 | 23.80 | 32.14 |
| 28-H-L-2 | 27.28 | 1.08 | 25.55 | 30.18 | 28.87 | 1.73 | 24.34 | 31.96 |
| 28-L-H-1 | 21.60 | 0.47 | 20.26 | 22.87 | 57.63 | 4.50 | 43.95 | 74.16 |
| 28-M-H-1 | 24.41 | 0.63 | 22.90 | 25.70 | 56.95 | 5.96 | 40.43 | 70.06 |
| 28-H-H-1 | 27.18 | 1.02 | 25.16 | 29.24 | 54.29 | 6.21 | 39.15 | 66.30 |
| 29-L-L-1 | 21.80 | 0.42 | 20.97 | 22.37 | 33.84 | 0.79 | 32.94 | 36.11 |
| 29-L-L-2 | 21.97 | 0.38 | 21.02 | 22.46 | 33.95 | 0.73 | 33.16 | 35.94 |
| 29-M-L-1 | 24.57 | 0.73 | 23.23 | 26.03 | 33.44 | 1.34 | 29.99 | 35.98 |
| 29-H-L-1 | 27.26 | 0.90 | 25.57 | 29.43 | 31.94 | 1.52 | 27.69 | 34.79 |
| 29-L-H-1 | 21.13 | 0.40 | 20.07 | 22.13 | 58.67 | 4.39 | 46.42 | 72.89 |
| 29-M-H-1 | 24.14 | 0.78 | 22.00 | 25.99 | 56.31 | 6.04 | 39.9  | 70.24 |
| 29-H-H-1 | 26.81 | 1.17 | 24.55 | 29.66 | 54.30 | 7.21 | 37.91 | 68.60 |
| 30-L-L-2 | 21.30 | 0.77 | 19.89 | 22.68 | 31.93 | 1.41 | 28.76 | 34.44 |
| 30-M-L-1 | 24.08 | 1.01 | 22.17 | 26.22 | 30.27 | 1.77 | 26.10 | 34.08 |
| 30-H-L-1 | 26.90 | 1.12 | 24.67 | 29.33 | 28.13 | 1.82 | 24.16 | 32.31 |
| 30-L-H-1 | 20.25 | 0.89 | 18.42 | 21.47 | 63.85 | 7.42 | 44.19 | 77.84 |
| 30-M-H-1 | 23.89 | 1.06 | 21.81 | 26.41 | 56.25 | 7.99 | 37.60 | 72.89 |
| 30-H-H-1 | 26.61 | 1.23 | 23.93 | 29.33 | 53.43 | 8.08 | 36.67 | 69.00 |
